# Supplementary material
Source: PubMed Central journal article supplement (PMC2781531)
Supplement: supp_M109.049858_jbc.M109.049858-1.pdf [file supp_M109.049858_jbc.M109.049858-1.pdf]

## Supplemental Figures

**Supplemental Figure 1. Schematic diagram of the *Schistosoma mansoni* eIF4E interaction network with the m<sup>7</sup>GpppG cap.** The broken lines denotes the hydrogen-bonding interactions and “” denotes the hydrophobic interactions. The diagram was prepared using LigPlot (1).

**Supplemental Figure 2. Superimposition of schistosome eIF4E- m<sup>7</sup>GpppA and eIF4E- m<sup>7</sup>GpppG crystal structures.** Schistosome eIF4E bound to m<sup>7</sup>GpppA (Blue, dinucleotide cap) is shown in blue and schistosome eIF4E bound to m<sup>7</sup>GpppG (Red, dinucleotide cap) is shown in yellow.

## References

1. Wallace, A. C., Laskowski, R. A., and Thornton, J. M. (1995) *Protein engineering* **8**, 127-134

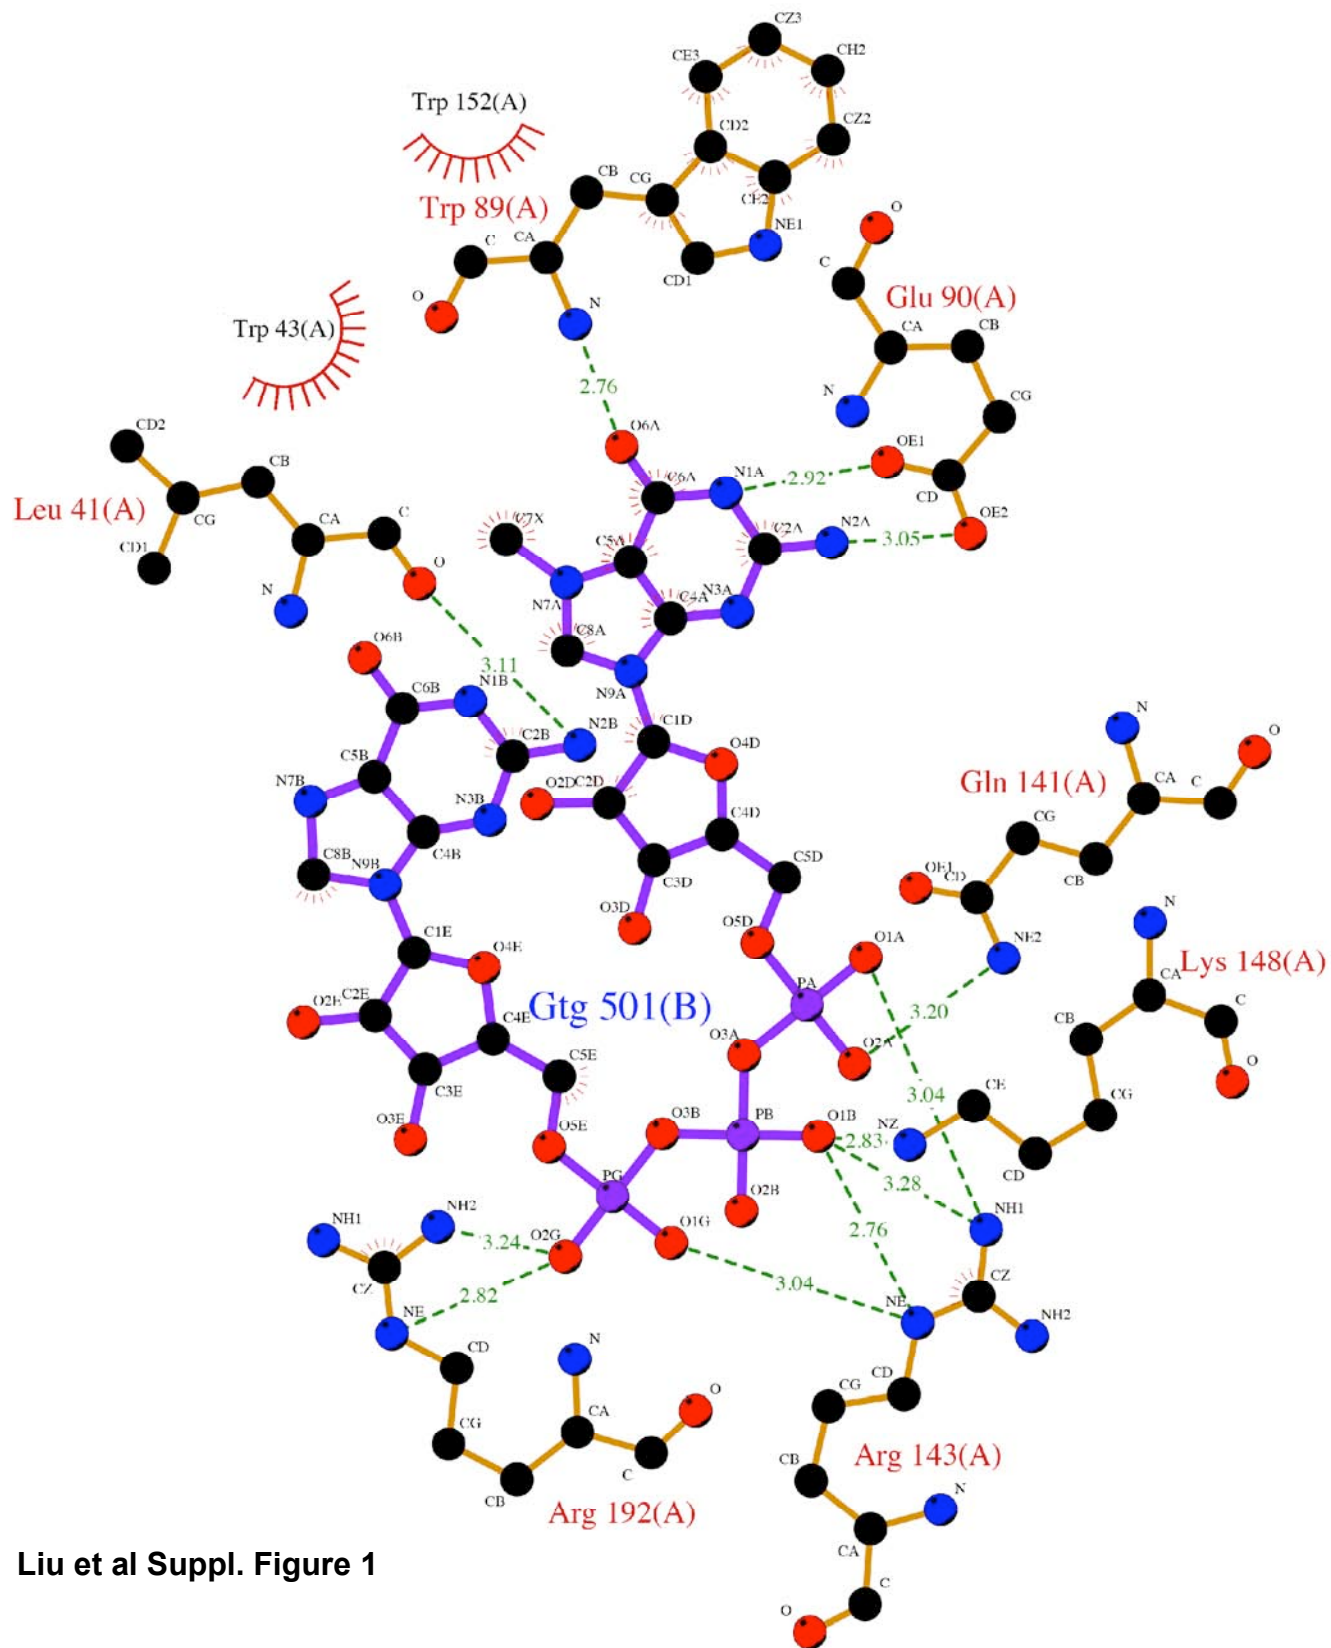

Liu et al Suppl. Figure 1

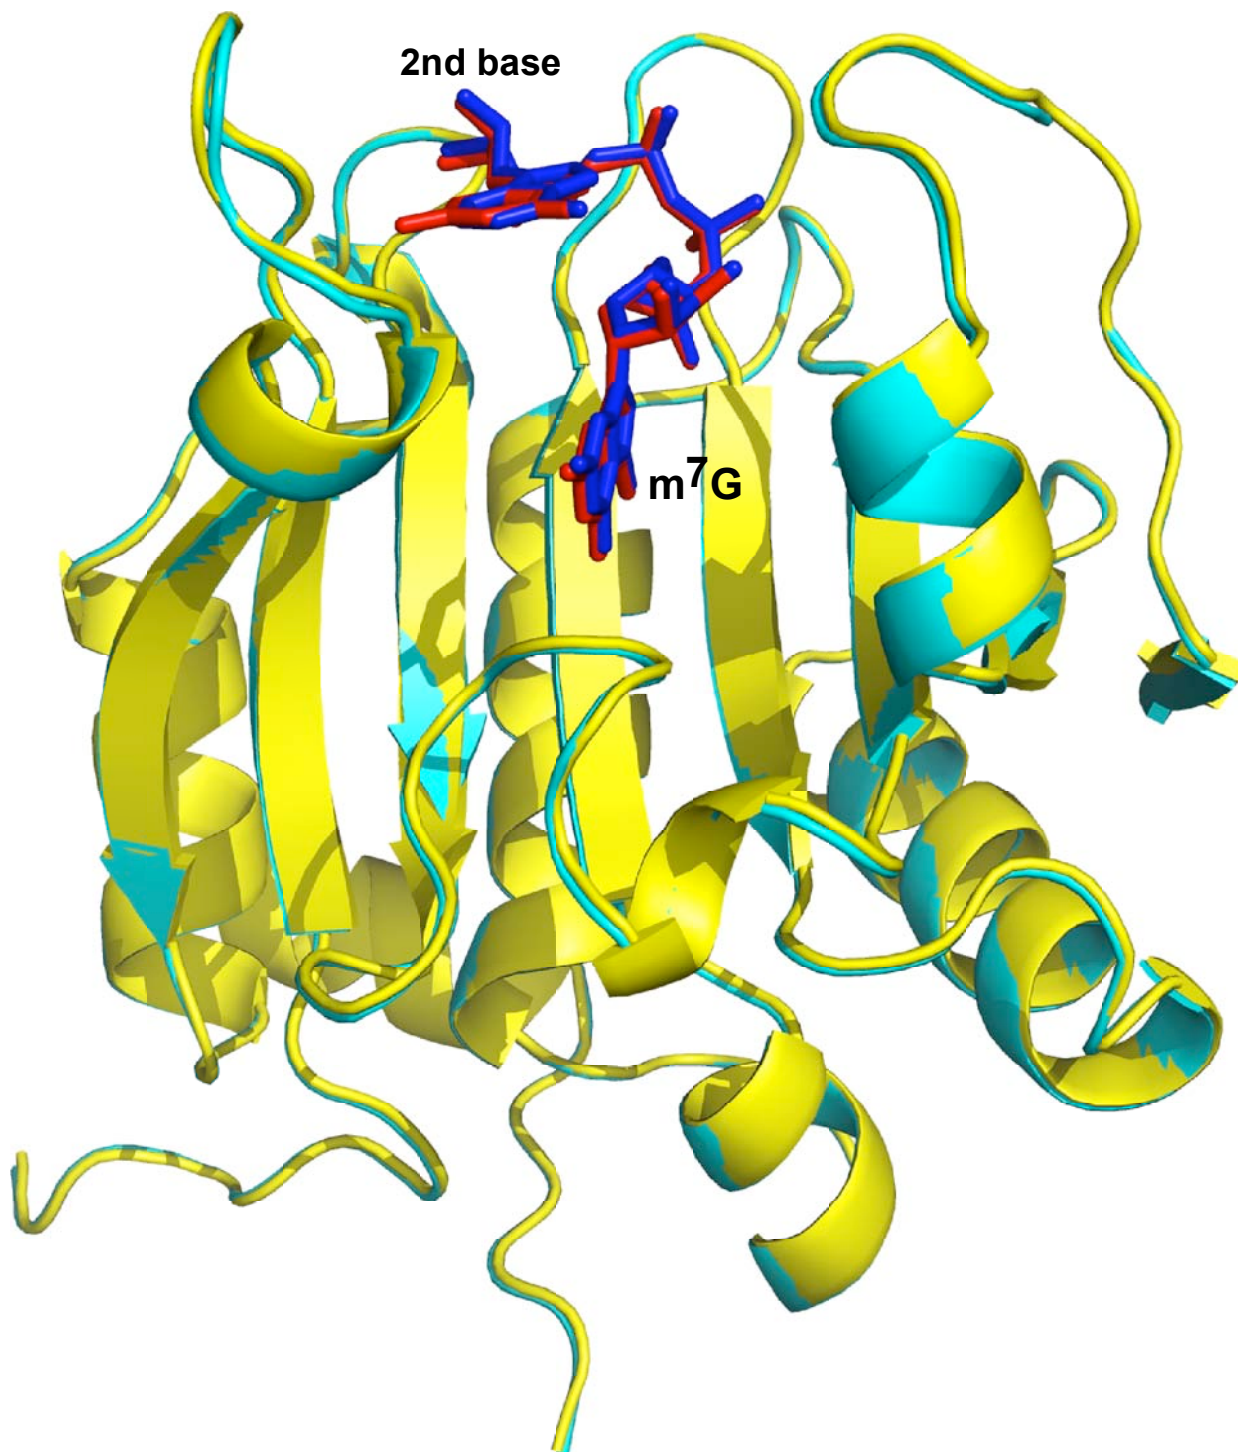

Liu et al Suppl. Figure 2
